# Supplementary material for: A measurement and model study on ozone characteristics in marine air at a remote island station and its interaction with urban ozone air quality in Shanghai, China
Source: Copernicus journal article supplement (doi:10.5194/acp-2020-681), 2020-08-12
Supplement: Supplementary file [file acp-2020-681-AC2-supplement.pdf]

# Manuscript acp-2020-681

## Response to Referee #2

This study conducted observational and modeling analysis of baseline ozone in oceanic air at Sheshan Island (SSI), which is located to the east of Shanghai city. The authors reported a six-year measurement of ozone concentration at SSI and its ozone level is much high than the value of downtown site in Shanghai. They further highlight the importance of understanding the interaction between urban plume and oceanic inflows in ozone pollution. In particular, their modeling results show that ozone in the oceanic inflows can enhance urban ozone by 20-30%.

We thank the reviewer for all the insightful comments. Please see our point-by-point response (in blue) to the general and specific comments below. The changes that have been made to the manuscript are also listed.

Overall, this manuscript is well structured and sites in the scope of this journal. Recent studies have increasingly focused on urban ozone pollution in China, but study on background ozone is still very limited. As such, this study could enrich our understanding of ozone pollution in China, particularly for coastal cities. Although this manuscript is publishable, the current version should be improved in terms of presentation and clarification. I would like the authors to address my following comments.

-This study shows observed ozone levels in a remote site and urban site. In fact, urban ozone in Shanghai are available from Chinese measurement network. It will be great if the authors could have more ozone measurements in this study. For example, Figure 8 is a good place to show more urban ozone data.

Response: Thanks for the suggestions. Since O<sub>3</sub> measurements in urban Shanghai from Chinese measurement network are only publicly available after March 2013, the data length cannot cover the whole study period in this study. To provide more measurements in Fig. 8, we added continuous O<sub>3</sub> measurements obtained from Sheshan (SS), Pudong (PD), and DT (Dongtan) sites in Shanghai. O<sub>3</sub> concentrations were measured using the

same method as those at SSI and XJH during the period 2012–2017. Figure 8 and Table 4 have been revised same as Fig. R1 and Table R1. Corresponding discussions in Sect. 3.5 are revised as follows:

“Figure 8 displays the simulated and observed monthly mean distributions of surface O<sub>3</sub> concentrations in BC\_40, BC\_50 and BC\_60 scenarios, respectively. In addition to the observations at XJH and SSI, O<sub>3</sub> measurements obtained from other three sites, Pudong (PD, suburban), Sheshan (SS, rural), and Dongtan (DT, rural), during the same period were introduced to evaluate the model’s performance in simulating O<sub>3</sub> in Shanghai. The O<sub>3</sub> concentrations at all the sites were measured using the same method as described in Sect. 2.1. The calculated distributions of O<sub>3</sub> agree with observations, which exhibit lower values in urban regions compared to those in rural and ocean areas, indicating strong O<sub>3</sub> depressions in the city of Shanghai due to the VOC-limited O<sub>3</sub> formation regime. The R values between the simulated and observed O<sub>3</sub> concentrations are all larger than 0.50 at continental sites (XJH, PD, SS, and DT), suggesting good prediction of O<sub>3</sub> variations by the model.

Table 4 displays the statistical results of the comparisons between the simulated and observed surface O<sub>3</sub> concentrations at different sites in Shanghai. Generally, the WRF-Chem model underestimates O<sub>3</sub> concentrations at all the sites in most cases. Taken the BC\_40 scenario for example, the O<sub>3</sub> concentrations are underestimated by 9.4–27.6% at continental sites and 36.1% at SSI, suggesting larger underestimation of O<sub>3</sub> concentrations in oceanic regions. Model results further suggest that elevated O<sub>3</sub> levels in the eastern chemical BCs would lead to increases in O<sub>3</sub> concentrations at both urban and remote sites when the prevailing winds are mostly easterly in Shanghai. With O<sub>3</sub> concentrations increasing from 40 to 60 ppbv in the easterly oceanic air inflows, the simulated monthly mean O<sub>3</sub> concentrations increase by 7.0–9.7 ppbv at continental sites and 10.4 ppbv at SSI. The underestimation of O<sub>3</sub> levels by the model is also greatly improved in the BC\_60 scenario, when the chemical BCs of O<sub>3</sub> are more close to the observations. Compared to those in the BC\_40 scenario, the normalized mean bias (NMBs) of the predicted O<sub>3</sub> concentrations reduced at most sites in the BC\_60 scenario,

for example from -36.1 % to -18.1 % at SSI and -27.6% to -4.6% at XJH, suggesting a crucial role of the eastern oceanic air inflows in influencing O<sub>3</sub> air quality in Shanghai.”

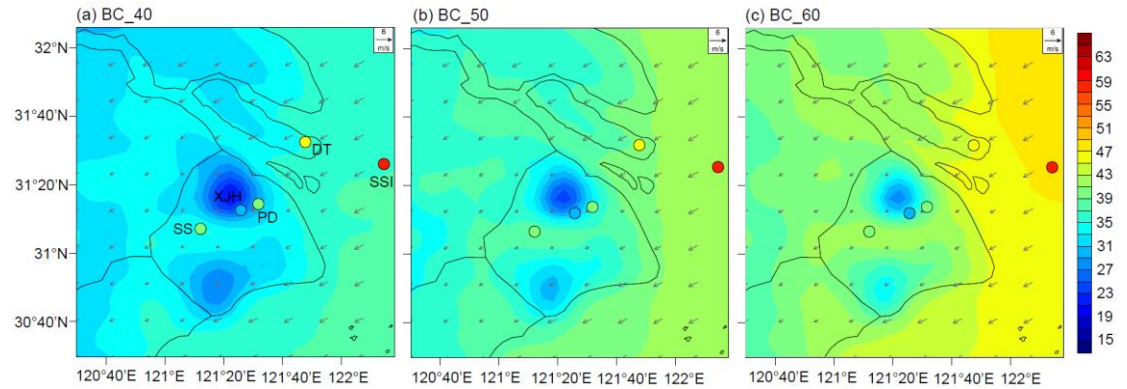

Figure R1 Calculated distributions of monthly mean O<sub>3</sub> concentrations (shades, ppbv) from BC\_40, BC\_50 and BC\_60 simulations, respectively in September 2014. Model results are compared with observed mean O<sub>3</sub> concentrations (circles, ppbv) obtained from Sheshan (SS), Xujiahua (XJH), Pudong (PD), DT (Dongtan) and Sheshan Island (SSI) sites. Also shown is the calculated wind field (m s<sup>-1</sup>) averaged over the same period.

Table R1 Statistical results of the comparisons between the simulated and observed surface O<sub>3</sub> concentrations at Sheshan (SS), Xujiahua (XJH), Pudong (PD), DT (Dongtan) and Sheshan Island (SSI) sites during September 2014. The calculated O<sub>3</sub> levels are obtained from BC\_40, BC\_50 and BC\_60 simulations, respectively. Values of the average surface O<sub>3</sub> concentrations (Mean) and normalized mean bias (NMB) are displayed. The NMB is defined as  $NMB = \frac{\sum_{i=1}^n (P_i - O_i)}{\sum_{i=1}^n O_i}$ , where  $P_i$  and  $O_i$  are predicted and observed ozone mixing ratios for sample  $i$ ,  $n$  is the number of total samples (numbers in parentheses).

|                | Cases       | SS (681) | XJH (641) | PD (690) | DT (690) | SSI (720) |
|----------------|-------------|----------|-----------|----------|----------|-----------|
|                | Observation | 39.7     | 30.4      | 40.3     | 46.4     | 57.7      |
| Mean<br>(ppbv) | BC_40       | 36.0     | 22.0      | 29.5     | 35.3     | 36.9      |
|                | BC_50       | 39.1     | 25.1      | 33.3     | 39.6     | 41.8      |
|                | BC_60       | 43.1     | 29.0      | 37.9     | 45.0     | 47.3      |
| NMB(%)         | BC_40       | -9.4     | -27.6     | -26.7    | -23.9    | -36.1     |
|                | BC_50       | -1.5     | -17.5     | -17.2    | -14.5    | -27.5     |

- This study gives daily mean of ozone in both observational and modeling calculation. I am wondering if the authors can show more results for MDA8 ozone. Since MDA8 ozone is the standard air quality metric for ozone.

Response: Thanks for the suggestions. We have presented results for MDA8 O<sub>3</sub> in the revised manuscript. The new results added are as follows:

Sect. 3.2:” The observed mean daily maximum 8-h average (MAD8) O<sub>3</sub> concentrations exhibited same differences between the two sites, which were 40.1 and 62.0 ppbv, respectively at XJH and SSI.”

Sect. 3.3:” The monthly mean MDA8 and daily extreme values of O<sub>3</sub> exhibited similar differences between the two sites. The calculated increasing rates of MDA8 O<sub>3</sub>, O<sub>3-max</sub> and O<sub>3-min</sub> were 2.73, 2.77, and 1.35 ppbv yr<sup>-1</sup> ( $\alpha < 0.05$ ), respectively at XJH, and 1.01, 1.35, and 1.27 ppbv yr<sup>-1</sup> ( $\alpha > 0.10$ ), respectively at SSI.”

-Line 27: “production” might be more appropriate than “oxidation”.

Response: Revised.

-Line 89: please spell out months.

Response: Revised.

-Lines 252-253: will this ratio be helpful in this study?

Response: The ratio of daily maximum O<sub>3</sub> concentration (O<sub>3-max</sub>) to minimum O<sub>3</sub> concentration (O<sub>3-min</sub>) was usually regarded as an indicator to identify if a site could be considered as a typical background site as suggested in previous studies (Cvitas and Klasinc 1993; Cvitas et al., 1995; Vingarzan, 2004). For SSI, the mean ratio of O<sub>3-max</sub>/O<sub>3-min</sub> was calculated to be 3.03 during the study period, which was consistent with the typical values observed at continental background sites in China (Xu et al., 2008; Meng et al., 2009; Gu et al., 2020). In September and October, the ratio exhibited even low values

at SSI, ranging from 1.61–2.35. The results helped to further indicate that the observed O<sub>3</sub> at SSI, especially in September and October, were least contaminated by regional pollution. And the SSI site could be regarded as a typical oceanic background site, providing a good proxy to study the baseline oxidation capacity of oceanic atmosphere in eastern China.

-Line 293: “few” looks not reasonable, since you still saw an increase trend of 1.12ppb yr<sup>-1</sup>.

Response: Thanks for pointing out that. This part has been revised as :”... the statistically insignificant changes of O<sub>3</sub> detected at SSI indicated that O<sub>3</sub> in the oceanic air remained a constant level during the study period and was less influenced by the decreases of NO<sub>x</sub> emissions.”

-Lines 346-348: is there any changes in ozone production sensitivity in response to NO<sub>x</sub> control?

Response: Yes. Based on measurements obtained from the same sites, Xu et al. (2019) has carefully examined the response of O<sub>3</sub> production sensitivity to NO<sub>x</sub> reductions in Shanghai during the past decade. The O<sub>3</sub> isopleth diagram (Fig. R2) constructed by the Ozone Isopleth Plotting Package Research (OZIPR) model suggested that the O<sub>3</sub> production had moved from strong VOC-limited regime to slight VOC-limited regime in both urban and suburban sites in Shanghai due to the significant NO<sub>x</sub> reductions and slight VOCs changes from 2009 to 2015. In 2017, the observed mean NO<sub>x</sub> concentrations at XJH and PD decreased by 3.5 and 0.3 ppbv, respectively compared to those (33.2 ppbv at XJH and 22.6 ppbv at PD) in 2015, indicating that the O<sub>3</sub> production could still be VOC-limited in Shanghai according to Fig. S1. The results suggested that the O<sub>3</sub> production remained VOC-limited in Shanghai during the study period and the changes in O<sub>3</sub> production induced by NO<sub>x</sub> reductions did not affect the main conclusion of the manuscript.

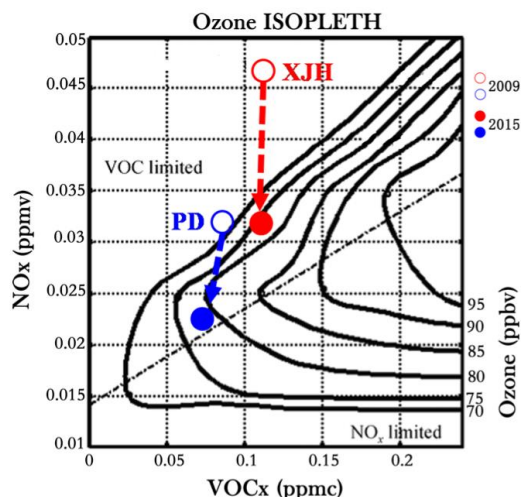

Figure R2 The O<sub>3</sub> isopleth diagram constructed by the OZIPR model in Shanghai (Xu et al., 2019).

We have revised this part as:” The results are in accordance with Tie et al. (2013) and Xu et al. (2019), who suggested that Shanghai and a broader regional area surrounding the city were all in the VOC-limited O<sub>3</sub> formation regime during the study period.”

-Line 397: remove space before “%”.

Response: Removed.

-Line 492:  $\alpha$  should be  $<0.05$  according to Table 3.

Response: Revised.

#### Reference

- Cvitas, T., and Klasinc, L.: Measurement of tropospheric ozone in the Eastern Mediterranean, *Boll. Geofisico*, 16, 521–527, 1993.
- Cvitas, T., Kezele, N., Klasinc, L., and Lisac, J.: Tropospheric ozone measurements in Croatia, *Pure Appl. Chem.*, 67, 1450–1453, 1995.
- Gu, Y., Li, K., Xu, J., Liao, H., Zhou, G.: Observed dependence of surface ozone on increasing temperature in Shanghai, China. *Atmos. Environ.*, 221, 117108, 2020.
- Meng, Z. Y., Xu, X. B., Yan, P., Ding, G. A., Tang, J., Lin, W. L., Xu, X. D., and Wang, S. F.: Characteristics of trace gaseous pollutants at a regional background station in Northern China, *Atmos. Chem. Phys.*, 9, 927–936, <https://doi.org/10.5194/acp-9-927-2009>, 2009.
- Vingarzan, R.: A review of surface ozone background levels and trends, *Atmos. Environ.*, 38, 3431–3442, 2004.

- Xu, J., Tie, X., Gao, W., Lin, Y., and Fu, Q.: Measurement and model analyses of the ozone variation during 2006 to 2015 and its response to emission change in megacity Shanghai, China, *Atmos. Chem. Phys.*, 19, 9017–9035, 2019.
- Xu, X., Lin, W., Wang, T., Yan, P., Tang, J., Meng, Z., and Wang, Y.: Long-term trend of surface ozone at a regional background station in eastern China 1991–2006: enhanced variability, *Atmos. Chem. Phys.*, 8, 2595–2607, 2008.
